# Supplementary figures and images for: Tracing the legacy of the early Hainan Islanders - a perspective from mitochondrial DNA
Source: Springer Nature journal article supplement (doi:10.1186/1471-2148-11-46), 2011-02-15

**M12a1-16362**

**M12a1-16362 (only Hainan Island) 12.6 ± 7.4 kya**

**6.9 ± 3.4 kya**

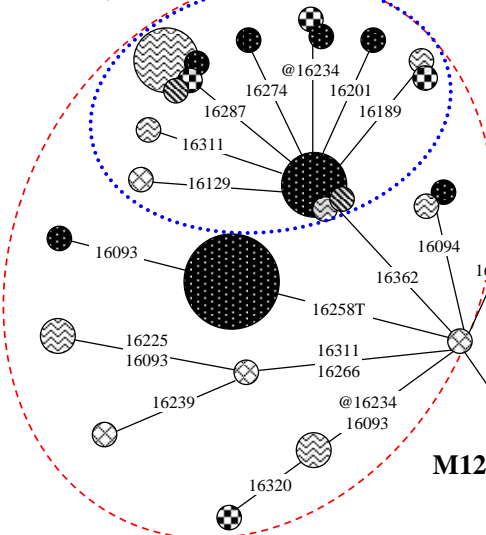

**M12a1\* (w/o M12a1b)  
24.2 ± 10.0 kya**

**M12a1**  
**M12a1b**  
**M12a2**  
**M12b (N=28)**  
**M12 (N=98)**  
**M † 16223-73-263**

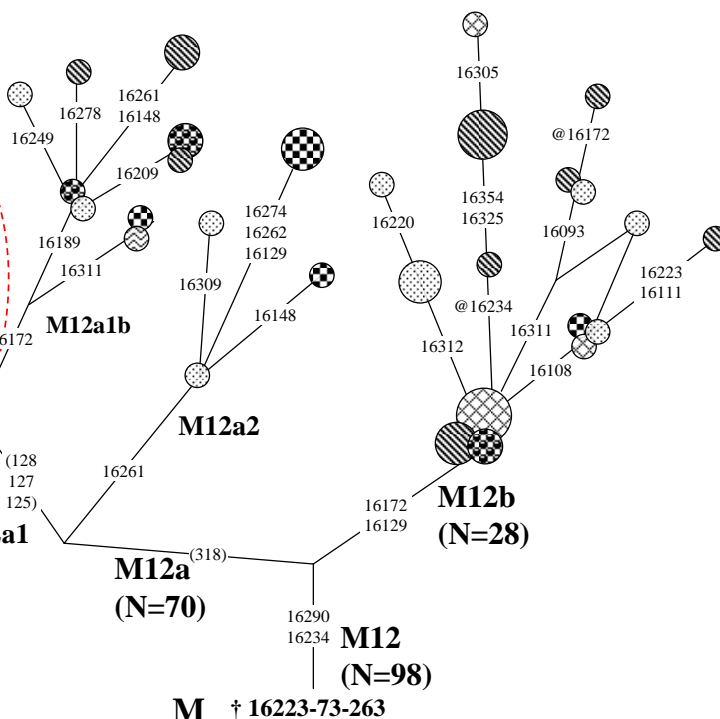

15  
①

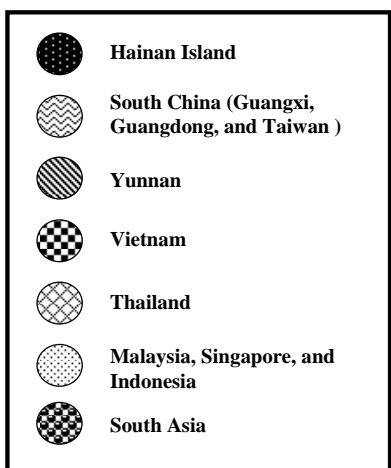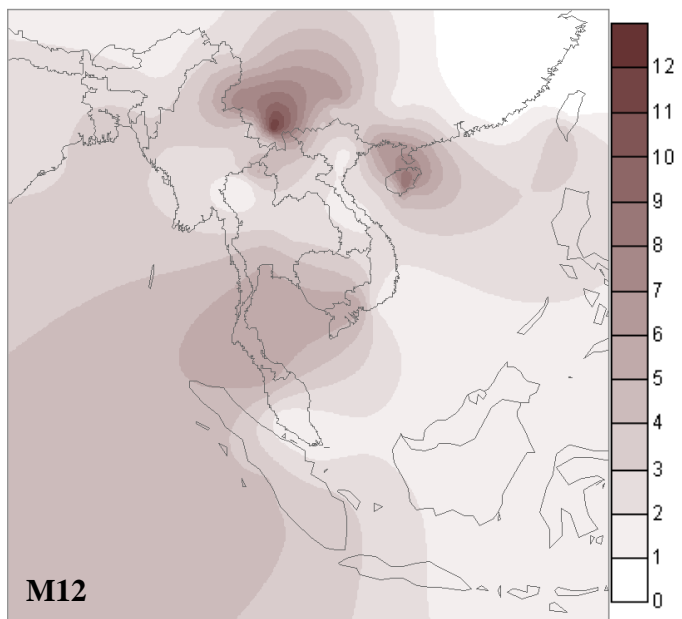

Supplement: 12862_2010_1645_MOESM13_ESM.pdf [file 12862_2010_1645_MOESM13_ESM.pdf]

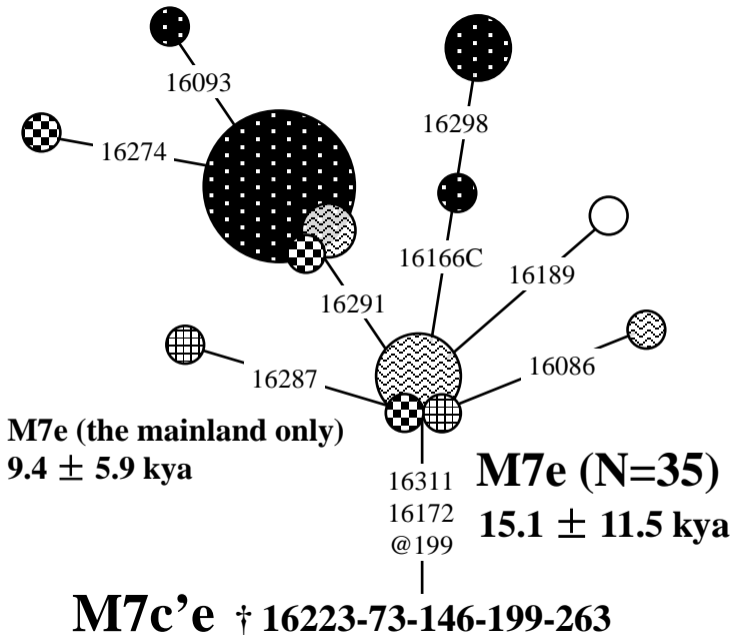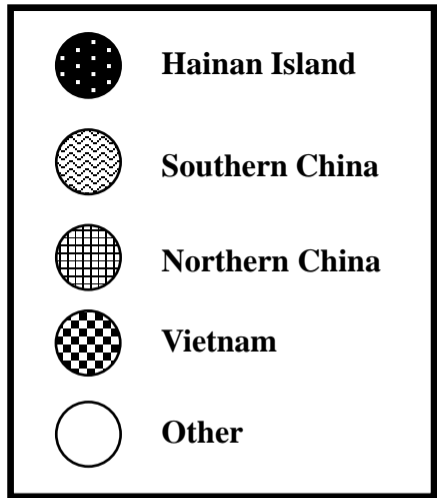

**16**  
 ①

Supplement: 12862_2010_1645_MOESM14_ESM.pdf [file 12862_2010_1645_MOESM14_ESM.pdf]
